# Supplementary material for: The public health playbook: ideas for challenging the corporate playbook
Source: PubMed Central journal article supplement — Lancet Glob Health. 2022 May 24;10(7):e1067–72. doi: 10.1016/S2214-109X(22)00185-1 (PMC9197808; doi:10.1016/s2214-109x(22)00185-1), 2022-05-24
Supplement: mmc1.pdf [file mmc1.pdf]

# THE LANCET

## Global Health

### Supplementary appendix 1

This translation in Spanish was submitted by the authors and we reproduce it as supplied. It has not been peer reviewed. *The Lancet's* editorial processes have only been applied to the original in English, which should serve as reference for this manuscript.

Los autores nos proporcionaron esta traducción al español y la reproducimos tal como nos fue entregada. No la hemos revisado. Los procesos editoriales de *The Lancet* se han aplicado únicamente al original en inglés, que debe servir de referencia para este manuscrito.

Supplement to: Lacy-Nichols J, Marten R, Crosbie E, Moodie R. The public health playbook: ideas for challenging the corporate playbook. *Lancet Glob Health* 2022; published online May 24. [https://doi.org/10.1016/S2214-109X\(22\)00185-1](https://doi.org/10.1016/S2214-109X(22)00185-1).

# El manual de estrategias de salud pública: ideas para desafiar el manual de estrategias corporativas

Jennifer Lacy-Nichols, Robert Marten, Eric Crosbie, Rob Moodie

Muchos actores comerciales utilizan una variedad de estrategias coordinadas y sofisticadas para proteger los intereses comerciales –su ‘Manual de Estrategias Corporativas’ – pero a menudo estas estrategias son a expensas de la salud pública. Para contrarrestar este Manual de Estrategias Corporativas y promover la salud y bienestar, los actores de la salud pública necesitan desarrollar, refinar y modernizar su propio conjunto de estrategias, para crear un Manual de Estrategias Corporativas. En este artículo de opinión, buscamos consolidar el pensamiento sobre cómo la salud pública puede contrarrestar y minimizar de manera proactiva las poderosas influencias comerciales. Proponemos ocho estrategias iniciales para dicho Manual de Estrategias de la Salud Pública: ampliar la fuerza laboral y coaliciones de salud pública; incrementar los recursos del sector público; vincular y aprender de los movimientos sociales para fomentar la solidaridad colectiva; proteger a los defensores de la salud pública de las amenazas de la industria; desarrollar e implementar salvaguardas rigurosas contra el conflicto de intereses; vigilar y exponer las actividades corporativas; desmentir los argumentos corporativos; y aprovechar diversos intereses comerciales. Este conjunto de estrategias busca amplificar los activos inherentes de la comunidad de la salud pública y crear oportunidades para contrarrestar explícitamente el Manual de Estrategias Corporativas. Estas estrategias no son exhaustivas, y nuestro objetivo es fomentar una mayor conversación y exploración sobre este tema.

## Introducción

Para proteger sus intereses, muchos actores usan una variedad de estrategias integradas y sofisticadas que consideramos es un Manual de Estrategias Corporativas.<sup>1-4</sup> Este manual de estrategias está diseñado para proteger y promover los intereses comerciales, a menudo a expensas de la salud pública,<sup>5</sup> el ambiente,<sup>4</sup> y la democracia.<sup>6</sup> El Manual de Estrategias Corporativas abarca numerosas industrias que dañan el planeta y la salud, incluidas la del tabaco, alcohol, juegos de azar, productos farmacéuticos, alimentos y bebidas ultraprocesados, armas, automóviles, redes sociales y tecnología, petróleo y gas, y productos químicos. El Manual de Estrategias Corporativas también abarca los actores e industrias destinados a apoyar estas prácticas, tal como cabilderos, abogados, asesores fiscales, marketing y relaciones públicas.<sup>5,7</sup> Más allá de estas industrias dañinas, la privatización de los bienes y servicios públicos (incluidos la atención médica, educación, encarcelamiento, defensa, cuidado de personas mayores y transporte público) es un

crucial determinante comercial de la salud y es a menudo pasado por alto.<sup>8</sup> – ya que los actores comerciales en este medio también ponen en práctica el Manual de Estrategias Corporativas.

No existe un ‘Manual de Estrategias Corporativas’ formal que se distribuya en las reuniones anuales o que sea parte del proceso de incorporación del personal. Tampoco se limita únicamente a las corporaciones –asociaciones comerciales, organizaciones sin fines de lucro (a menudo financiadas por corporaciones) y otros actores comerciales y cuasi comerciales también implementan estrategias del Manual de Estrategias Corporativas. Reconocemos que el sector comercial es diverso. Más allá de las diferencias organizacionales (por ejemplo, corporaciones versus cooperativas), los actores comerciales tienen diferentes carteras, cuotas de mercado, presencias geográficas, ingresos, márgenes de ganancia y otros activos tangibles e intangibles. Sus acciones, intereses, incentivos y desincentivos difieren entre contextos.

Denominar y conceptualizar estos esfuerzos como el ‘Manual de Estrategias Corporativas’ hace explícita la idea de que, a pesar de la diversidad, muchos actores comerciales recurren constantemente a estrategias similares (Tabla). Por ejemplo, la industria del alcohol tergiversa la evidencia sobre los efectos adversos del alcohol en la salud y ha buscado durante mucho tiempo

desarrollar asociaciones público-privadas para presentar a la industria como un socio benévolo mientras construye argumentos de que individuos irresponsables tienen la culpa, en lugar del suministro de alcohol.<sup>9</sup> Desafortunadamente, la industria del alcohol no está sola en el uso de estas estrategias.

**Tabla 1. El Manual de Estrategias Corporativas (véase Apéndice para fuentes)**

|                                                                                                                                                                                                                                                                                                                                                                                          |                                                                                                                                                                                                                                                                                                                                     |
|------------------------------------------------------------------------------------------------------------------------------------------------------------------------------------------------------------------------------------------------------------------------------------------------------------------------------------------------------------------------------------------|-------------------------------------------------------------------------------------------------------------------------------------------------------------------------------------------------------------------------------------------------------------------------------------------------------------------------------------|
| <p><b>Intimidar y difamar a los críticos:</b> usar tácticas difamatorias, intimidación y demandas (o amenazas de demanda) contra los críticos de la industria, como científicos, académicos, profesionales de la salud, defensores, y grupos de sociedad civil.</p>                                                                                                                      | <p><i>En Colombia y México, los defensores del impuesto sobre bebidas azucaradas recibieron llamadas telefónicas amenazantes y sus computadoras fueron hackeadas.</i></p>                                                                                                                                                           |
| <p><b>Atacar y socavar la ciencia legítima:</b> financiar estudios, patrocinar conferencias, reclutar científicos corporativos, seleccionar cierta información, distorsionar la evidencia, pretender manipulación, exagerar la incertidumbre, plantar dudas, minimizar la gravedad del problema, insistir que el problema es muy complejo, y demandar ‘equilibrio’ para ambos lados.</p> | <p><i>La empresa química Monsanto bloqueó deliberadamente la investigación que demostraría la toxicidad de su producto Roundup, y los empleados de la empresa eran ‘escritores fantasmas’ en investigaciones supuestamente independientes.</i></p>                                                                                  |
| <p><b>Formular y reformular la discusión y el debate:</b> promover narrativas de responsabilidad personal/individual, moderación, libertades del consumidor, mercados libres, el ‘estado paternalista’, la intrusión del gobierno y las empresas como ‘parte de la solución’.</p>                                                                                                        | <p><i>La industria del plástico acuñó el término ‘litterbug’ y creó una campaña enfocada en la responsabilidad individual por los desechos, para distraer la atención de las regulaciones propuestas sobre sus prácticas de producción.</i></p>                                                                                     |
| <p><b>Acciones camuflaje:</b> aprovechar los grupos de fachada y los pseudo grupos de sociedad civil para que actúen como portavoces de la industria y crear una apariencia de independencia y evitar la mala publicidad.</p>                                                                                                                                                            | <p><i>Las grandes petroleras se promocionan a sí mismas como partidarias de las políticas contra el cambio climático, pero gastan millones en asociaciones comerciales como el Instituto Americano del Petróleo (American Petroleum Institute), el cual se opone enérgicamente a la regulación de los combustibles fósiles.</i></p> |
| <p><b>Influenciar el proceso político:</b> cabildear, hacer donaciones políticas, reclutar ex políticos, participar en el desarrollo de políticas para influir, bloquear, debilitar y retrasar los resultados políticos y normativos.</p>                                                                                                                                                | <p><i>Google cuenta con más de 258 instancias de actividad de ‘puertas giratorias’ en los Estados Unidos, incluidos funcionarios de la Casa Blanca, el Departamento de Justicia y la Comisión Federal de Comercio, las mismas agencias encargadas de investigar las leyes antimonopolio.</i></p>                                    |
| <p><b>Desarrollar alternativas corporativas a las políticas:</b> crear autorregulación voluntaria, códigos y compromisos para retrasar o prevenir las intervenciones de salud pública.</p>                                                                                                                                                                                               | <p><i>En respuesta a las preocupaciones sobre la promoción del discurso de odio y la incitación a la violencia por parte de Facebook/Meta, la empresa ha desarrollado una “junta de supervisión” interna criticada por su falta de independencia y mandato.</i></p>                                                                 |
| <p><b>Implementar la Responsabilidad Social Corporativa y Asociaciones:</b> donar a grupos comunitarios, deportes, entretenimiento, ONG y desarrollar asociaciones público-privadas con gobiernos y organizaciones confiables para fomentar la buena voluntad corporativa y distraer y desviar productos o comportamientos dañinos.</p>                                                  | <p><i>Las empresas de consultoría como KPMG se presentan a sí mismas como ‘retributivas’ a la sociedad (mientras tanto, la compañía ha ayudado a las empresas tabacaleras a desarrollar sus propias campañas engañosas de RSC).</i></p>                                                                                             |
| <p><b>Evitar y evadir las regulaciones y políticas:</b> impedir la implementación de políticas a través de impugnaciones legales en tribunales nacionales e internacionales, uso de lagunas legales, elusión fiscal, reestructuración corporativa y violación de leyes, tratados y códigos.</p>                                                                                          | <p><i>Philip Morris International demandó (sin éxito) a los gobiernos de Australia y Uruguay para que impidieran la implementación de sus leyes que exigen empaquetado genérico y etiquetado de advertencia en los productos de tabaco.</i></p>                                                                                     |

Sintetizado a partir de lo siguiente: Wiist <sup>1</sup>; Freudenberg <sup>3</sup>; Moodie <sup>10</sup>; Brownell, Warner <sup>2</sup>; Oreskes, Conway <sup>4</sup>

Algunas de las estrategias del Manual de Estrategias Corporativas como la intimidación o el debilitamiento de la ciencia, son abiertamente hostiles hacia los intereses de la salud pública. Otras estrategias están diseñadas para apaciguar o neutralizar a los críticos, como lo es el desarrollo de auto regulación, o la creación de productos más saludables o de productos para la reducción del daño.<sup>11</sup> El Manual de Estrategias Corporativas no es un fenómeno estático. Los actores comerciales son ágiles y dinámicos, adaptan estrategias y evolucionan en respuesta a las cambiantes presiones políticas y del mercado.<sup>12,13</sup>

El Manual de Estrategias Corporativas es global, pero en práctica es calibrado para los contextos y sistemas regulatorios locales. Para contrarrestar este Manual de Estrategias Corporativas y promover la visión de la salud pública de crear salud y bienestar, los actores de salud pública – junto con otros grupos como los de justicia social, medio ambiente, derechos humanos y derechos indígenas– deben desarrollar, perfeccionar y modernizar sus propios Manual de Estrategias de Salud Pública (panel).

Existen múltiples previos intentos de desarrollar enfoques para contrarrestar la influencia comercial, no solo para la salud pública, sino también para la sostenibilidad, los derechos humanos y la democracia. Estos problemas enfrentan una amenaza compartida de interferencia y oposición comercial. En este artículo de opinión, buscamos consolidar el pensamiento previo para contrarrestar la poderosa influencia comercial, así como resaltar posibles acciones para los actores de la salud pública. Establecemos ocho posibles estrategias y explicamos brevemente cómo estos pueden anticipar, prevenir y contrarrestar de manera proactiva las estrategias corporativas, así como amplificar las fortalezas existentes de la salud pública. Estas estrategias permitirán que los actores de la salud pública desarrollen la capacidad de la comunidad de la salud pública y grupos relacionados para desafiar y contrarrestar el Manual de Estrategias Corporativas Este conjunto de estrategias no es definitivo, y esperamos que provoque el desarrollo de estrategias e ideas adicionales.

**Tabla 2. El Manual de Estrategias de Salud Pública**

|   |                                                                                                                                                                                                                                                                                                     |
|---|-----------------------------------------------------------------------------------------------------------------------------------------------------------------------------------------------------------------------------------------------------------------------------------------------------|
| 1 | <b><u>Ampliar el plan de estudios de salud pública y expandir la colaboración:</u></b> Ampliar la capacitación a los profesionales de la salud pública y reclutar de manera activa personal de salud pública no tradicional para el servicio de salud pública.                                      |
| 2 | <b><u>Incrementar los recursos del sector público:</u></b> Promover políticas e iniciativas para asegurar que los gobiernos cuenten con los recursos financieros y humanos para garantizar a sus ciudadanos el derecho a bienes y servicios fundamentales.                                          |
| 3 | <b><u>Vincular y aprender de los movimientos sociales para fomentar la solidaridad colectiva:</u></b> Aprender de las contratáticas y conocimiento político de otras organizaciones activistas y fomentar la solidaridad colectiva a través de objetivos compartidos y la formación de coaliciones. |
| 4 | <b><u>Proteger a los defensores de la salud pública de las amenazas de la industria:</u></b> Desarrollar un conjunto de recursos para informar y apoyar a profesionales de la salud, investigadores, y otros actores de la salud pública.                                                           |
| 5 | <b><u>Desarrollar e implementar salvaguardas rigurosas contra el conflicto de intereses:</u></b> Proteger a las organizaciones y políticas de salud pública de la influencia comercial inapropiada.                                                                                                 |
| 6 | <b><u>Vigilar y exponer las actividades corporativas:</u></b> Recopilar sistemáticamente información sobre el mercado y las actividades políticas de las corporaciones y compartir esta información ampliamente.                                                                                    |
| 7 | <b><u>Desmentir los argumentos corporativos:</u></b> Proporcionar contrapuntos a los argumentos corporativos que subrayen los determinantes sociales y comerciales de la salud                                                                                                                      |
| 8 | <b><u>Aprovechar diversos intereses comerciales:</u></b> Identificar intereses o tensiones divergentes entre actores comerciales y aprovecharlos de manera estratégica para debilitar las coaliciones de la industria o las empresas individuales.                                                  |

### **Ampliar el plan de estudios de salud pública y expandir la colaboración**

Esta estrategia consiste en dos partes. La primera es capacitar a la próxima generación de profesionales de la salud pública para que

comprendan y desafien a las poderosas fuerzas comerciales. El enfoque actual en aspectos técnicos de epidemiología, bioestadística, evaluación y economía de la salud es insuficiente. A los estudiantes de salud pública se les debe

ofrecer capacitación en ciencias políticas, derecho, economía, abogacía y comunicaciones (incluida la estrategia digital, movilización comunitaria, políticas públicas y negocios). Un primer paso pragmático sería que las escuelas de posgrado en salud pública ofrezcan clases sobre los Determinantes Comerciales de la Salud para sensibilizar a la futura fuerza laboral de salud pública.<sup>13</sup>

Los Determinantes Comerciales de la Salud también deben agregarse al plan de estudios de medicina. Asimismo, los defensores de la salud pueden trabajar más de cerca con médicos, enfermeras, enfermeros y profesionales de la salud afines para participar en los medios de comunicación, testificar, cabildear a legisladores y fomentar una mayor conciencia de salud en el público (por ejemplo, cirujanos ortopedistas que lideren campañas de abogacía para la prevención de accidentes viales y oncólogos que apoyen los esfuerzos para el control del tabaco).<sup>14</sup>

El segundo elemento de la estrategia es la necesidad de colaborar con una coalición de actores más amplia. Dicha colaboración podría incluir actuales y expolíticos y burócratas, periodistas, abogados, expertos en negocios y campeones de la comunidad (apéndice pp 1-2). La lista de posibles aliados de los defensores de la salud pública es, en teoría, ilimitada, y dependerá del contexto y el problema. Un primer paso es reconocer la necesidad de diversas perspectivas, habilidades y socios, así como la necesidad de fomentar conexiones. Será necesario el trabajo subsecuente para identificar procesos que faciliten la participación significativa y efectiva.

### **Incrementar los recursos del sector público**

Para desarrollar y hacer cumplir regulaciones estrictas de salud pública y proveer una alternativa a las iniciativas dirigidas por las empresas, el sector público debe contar con los recursos adecuados. Puede ser un desafío para los estados hacer que estos actores rindan cuentas, especialmente cuando las corporaciones transnacionales proporcionan inversión

extranjera directa. Además, COVID-19 ha revelado los riesgos de privatizar sectores de la economía (por ejemplo, la atención médica y el cuidado de adultos mayores); los llamados a "reconstruir mejor" deben garantizar que este no sea un enfoque exclusivamente dirigido por las empresas.<sup>15,16</sup> Algunos gobiernos están utilizando la remunicipalización para rescatar la propiedad del estado sobre los servicios privatizados (como el agua, la energía y las telecomunicaciones), lo cual ha reducido costos y mejorado la calidad del servicio, las condiciones de trabajo y la rendición de cuentas.<sup>17</sup> El uso de impuestos innovadores para la salud, como los que gravan el tabaco, el alcohol y las bebidas azucaradas, así como otros productos como los combustibles fósiles, también pueden incrementar los recursos públicos si los fondos se destinan a compromisos de gasto para mejorar la salud pública.<sup>18</sup> Una vía adicional es el implementar impuestos sobre el patrimonio o impuestos de solidaridad para garantizar que las corporaciones y élites multimillonarias paguen su parte justa. La reciente iniciativa del G20 2021 ha tomado ciertos pasos hacia un régimen tributario más justo, sin embargo sigue muy por debajo de lo necesario y corre el riesgo de ampliar las brechas existentes entre los países de bajos y altos ingresos.<sup>19</sup> La condonación de la deuda por parte instituciones financieras como el Banco Mundial y el Fondo Monetario Internacional ofrece un paso más para abordar las disparidades de riqueza neocoloniales entre regiones bajos y altos ingresos y fomentar la capacidad de los Países de Ingresos Bajos y Medios para que inviertan en salud pública.

### **Vincular y aprender de los movimientos sociales para fomentar la solidaridad colectiva**

Algunos profesionales podrán sostener con orgullo el título de activistas, pero la salud pública en general tiende a centrarse en enfoques menos políticos y más biomédicos. Sin embargo, desafiar el poder político y de mercado de las corporaciones transnacionales requiere nada menos que un cambio radical y revolucionario. A fin de cuentas, las compañías mas poderosas que bloquean los esfuerzos de la salud pública son

transnacionales, por lo que se necesitan redes y coaliciones transnacionales para contrarrestar esta influencia. A raíz de la pandemia de COVID-19, existen claras oportunidades para conectar con otros movimientos prosociales que comparten objetivos similares para una sociedad más equitativa, como aquellos que luchan contra el cambio climático, la corrupción política, las violaciones de derechos humanos o el control empresarial.

Existe el riesgo de que las agendas colectivas sean demasiado amplias, incluso sin expandir el alcance de movimientos particulares, sin embargo, existen claras oportunidades para que los defensores de la salud pública que trabajen en una variedad de temas y contextos aprendan de la experiencia de otras organizaciones que luchan contra poderosos intereses comerciales, como las son Avaaz, Move On, 38 degrees, Get Up y La Via Campesina. Un ejemplo emergente es el activismo accionario, donde las organizaciones benéficas y otras organizaciones compran acciones en empresas poderosas lo cual les otorga derechos de voto y, a través de esto, buscan influir en las acciones de la empresa desde adentro, por ejemplo, la propuesta de Oxfam para que Amazon incluya a un trabajador por hora en su junta directiva.<sup>20</sup> Esta estrategia no está exenta de limitaciones, como lo fue la estrategia de Philip Morris International de adelantarse al activismo accionario y convertirlo en un ejercicio de relaciones públicas.<sup>21</sup>

### **Proteger a los defensores de la salud pública de las amenazas de la industria**

Los defensores de la salud pública, legisladores, investigadores y otros profesionales enfrentan amenazas personales e intimidación por parte de actores corporativos, incluida la difamación, litigios, hackeadas, vigilancia y amenazas a su seguridad o la de su familia.<sup>22</sup> Desafortunadamente, esta dinámica de poder desigual entre actores de la salud pública y corporaciones es poco probable que cambie, pero hay pasos que se pueden tomar prepararse ante estas tácticas y, cuando sea posible, para brindar apoyo. Una estrategia es desarrollar relaciones e

involucrar más ampliamente a abogados en los esfuerzos de salud pública. Esto podría incluir el desarrollo de una guía con respuestas estratégicas ante las amenazas de litigio y difamación, adaptada a diferentes contextos legales y nacionales. El Centro McCabe para la Ley y el Cáncer (The McCabe Centre for Law and Cancer) en Australia brinda capacitación legal para apoyar a otros a desarrollar, implementar y defender leyes que aborden las enfermedades no transmisibles, y se podrían desarrollar modelos similares para brindar información y capacitación a activistas de la salud pública. Las instituciones de salud pública, como universidades, institutos de investigación u organizaciones no gubernamentales, también pueden brindar protección, ya sea mediante la provisión de recursos legales y financieros, así como un apoyo más amplio, como contratos de trabajo o tomando una postura pública para defender a los profesionales de la salud pública que han sufrido de amenazas.

Especialmente en los Países de Ingresos Bajos y Medios, donde el financiamiento de la salud pública es una preocupación real, las organizaciones internacionales, los donantes filantrópicos para la salud pública y los recursos nacionales recaudados a través de los impuestos también podrían usarse para desarrollar recursos para la protección ante las amenazas de la industria, brindar apoyo a los defensores amenazados y, en general, promover la salud y el bienestar— tal como las fundaciones Bloomberg y Open Society han hecho en el pasado.<sup>23</sup>

### **Desarrollar e implementar salvaguardas rigurosas contra el conflicto de intereses**

Los poderosos actores comerciales influyen en los foros de toma de decisiones locales, nacionales e internacionales, un statu quo que con frecuencia socava los esfuerzos para promover y proteger la salud pública. Esta influencia va más allá del cabildeo explícito y las donaciones políticas para incluir formas de poder e influencia más intratables y menos visibles, por ejemplo, la renuencia de algunos gobiernos a promulgar normas estrictas sobre las empresas

transnacionales si dependen de la inversión extranjera. Siendo realistas, los esfuerzos para minimizar la influencia comercial en la política son un juego que toma tiempo y que requiere un cambio fundamental en las estructuras de poder global y un desarrollo significativo de capacidades. Sin embargo, hay pasos que se pueden tomar por parte de las instituciones y actores de la salud pública para apoyar aquellos esfuerzos que buscan minimizar la influencia comercial. Desarrollar y hacer cumplir de manera proactiva salvaguardas rigurosas contra el conflicto de intereses (COI) es un elemento crucial para limitar la influencia comercial inapropiada en la formulación de políticas.<sup>24</sup> Las organizaciones de salud pública y las organizaciones no gubernamentales pueden predicar con el ejemplo, estableciendo estándares estrictos para los sistemas de salud, las políticas de salud, así como para sus financiadores, socios y patrocinadores de conferencias para proteger su misión y actividades de la interferencia comercial. Este comportamiento puede ayudar a normalizar la práctica de la debida diligencia. Los actores e instituciones de salud pública también pueden abogar por la implementación de estos estándares estrictos para los sistemas y políticas de salud en otros lugares (por ejemplo, en asociaciones deportivas como la Federación Internacional de Fútbol Asociación). Los ministerios y agencias gubernamentales de salud también pueden hacer cumplir los estándares contra el conflicto de interés a través de sus contratos y licitaciones. Las políticas contra el conflicto de interés son relevantes y necesarias para toda formulación de políticas, y los ministerios de salud pueden liderar su implementación, por ejemplo, empleando el enfoque preliminar de la OMS para prevenir y manejar los conflictos de interés en los programas de nutrición.<sup>25</sup> Estos esfuerzos de salvaguarda pueden limitar el actores múltiples descontrolado, el cual sus partidarios alaban como una forma de gobernanza más inclusiva y participativa,. Sin embargo, en realidad, a menudo corre el riesgo de socavar a actores con menos recursos a expensas de los intereses privados, los cuales disponen con

buenos recursos.<sup>26</sup> En el corto plazo, los estándares contra el conflicto de interés rigurosos pueden agregar una capa de escrutinio a los acuerdos actuales de actores múltiples.

### **Vigilar y exponer las actividades corporativas**

Los esfuerzos para responder y contrarrestar las tácticas corporativas se complementarían con la capacidad de anticipar, predecir y prevenir de manera proactiva las estrategias del Manual de Estrategias Corporativas antes de que ocurran. Algunas organizaciones han desarrollado bases de datos de información sobre prácticas corporativas tal como Tobacco Tactics, Stopping Tobacco Organizations and Products, Open Secrets, Transparency International, US Right to Know, Project Toxic Docs, Preemption Watch, así como la biblioteca de documentos de la industria de la USCF. Estas organizaciones tienen diferentes objetivos y misiones, sin embargo, todas se enfocan en la influencia de las corporaciones. Junto con estos esfuerzos, la naciente literatura sobre los Determinantes Comerciales de la Salud se ha acelerado desde el 2016 buscando esclarecer las prácticas comerciales. A través de enfoques de recopilación de datos a menudo novedosos, esta investigación acerca de las actividades corporativas proporciona una mirada desde adentro de los actores comerciales como vectores de enfermedades y mala salud, al estudiar sus operaciones internas, planes, informes, memorandos y correos electrónicos.<sup>27,28</sup> Afortunadamente, existen pasos que se pueden tomar para desarrollar una base de datos para el monitoreo de actores comerciales (apéndice pp 1-2).

### **Desmentir los argumentos corporativos**

El Manual de Estrategias Corporativas incluye una gran cantidad de argumentos y recursos retóricos –como el estado paternalista, responsabilidad personal/individual, asociación, libertad– los cuales son empleados para proteger los intereses comerciales y dañar los intereses de la salud pública.<sup>2,29</sup> Estos argumentos, a favor del capitalismo sin trabas y neoliberalismo, generalmente presentan a las corporaciones como actores benevolentes, al gobierno como invasivo y a los individuos como irresponsables. En efecto, el impulso por el actores múltiples

(especialmente en el desarrollo de los Objetivos de Desarrollo Sostenible) no es más que la manifestación más reciente de la omnipresencia de los paradigmas neoliberales en la gobernanza global.<sup>6</sup> Desafiar estos argumentos e ideologías requiere mucho más que evidencia académica – estos valores están tan profundamente arraigados en el tejido de la sociedad que pueden ser vistos no como 'valores', sino como verdades. Por lo tanto, una contra estrategia de salud pública comienza con la presentación de un conjunto alternativo de valores centrados en la equidad. Esto incluye volver a enfatizar continuamente que las mayores causas de la mala salud y la inequidad en la salud son estructurales: los determinantes sociales, políticos y económicos de la salud.<sup>30</sup> Y más aún, que las regulaciones gubernamentales, incluidos los impuestos progresivos, son los mecanismos basados en la ciencia más importantes para proteger la salud pública.<sup>31</sup> Existen múltiples estrategias para ampliar los mensajes de salud pública (apéndice pp 1-2).

### **Aprovechar diversos intereses comerciales**

El sector comercial dista de ser homogéneo y los diversos intereses de los actores comerciales pueden utilizarse para aprovechar el poder contra poder.<sup>11</sup> La agenda de desinversión es un excelente ejemplo del uso de un elemento del mundo comercial contra otro. Esta estrategia se ha centrado hasta ahora en un conjunto limitado de productos básicos (tabaco, combustibles fósiles y armas particularmente controversiales), pero existen llamados para generar actividades de inversión y desinversión que sean más centradas en la salud.<sup>32</sup> Las negociaciones en curso sobre el Tratado Vinculante de las Naciones Unidas sobre empresas y derechos humanos pueden brindar más oportunidades para promover una agenda a favor de la equidad.

Los actores de la salud pública también pueden tratar de fragmentar asociaciones industriales poderosas. Por ejemplo, el problema de los organismos genéticamente modificados y el etiquetado de azúcares añadidos en los Estados Unidos ha llevado a varias de las principales empresas de alimentos a renunciar a ser miembros de la Asociación de fabricantes de

comestibles, y el Consejo de intercambio legislativo americano también ha perdido numerosos miembros debido a su oposición a las políticas sobre el cambio climático.<sup>11,33</sup> Un patrón similar ha tomado lugar con empresas que han revocado el patrocinio de organizaciones controversiales (como la Asociación nacional del Rifle). Debilitar los poderosos grupos de cabildeo que utilizan las industrias es una vía para rectificar el gran desequilibrio de poder entre la salud pública y los actores corporativos.

### **Fortalecer la capacidad de la salud pública para abordar los intereses corporativos**

El Manual de Estrategias Corporativas de Salud Pública aquí descrito ofrece un paso inicial hacia la consolidación de ideas, prácticas y enfoques relevantes desde dentro y más allá de la salud pública, para desarrollar una contra estrategia. Busca ampliar los activos inherentes dentro de la comunidad de salud pública y crear oportunidades para contrarrestar el Manual de Estrategias Corporativas. Su estudio y aplicación podría convertirse en una parte importante de la formación en salud pública y de la regulación de productos, prácticas y políticas de las industrias que dañan la salud y el planeta, así como sus actores aliados. El Manual de Estrategias de Salud Pública también podría utilizarse para evaluar los recursos actuales de un equipo de salud pública y qué áreas necesitan fortalecerse. Esto podría incluir el desarrollo de objetivos específicos y el establecimiento de metas y de medidas de progreso.

Reconocemos que las estrategias aquí presentadas están lejos de ser exhaustivas. En el futuro, es necesario seguir trabajando para desarrollar un Manual de Estrategias de Salud Pública rigurosamente investigado y probado. Si bien tanto el Manual de Estrategias Corporativas como el Manual de Estrategias de Salud Pública presentan estrategias generalizadas, las iteraciones futuras del Manual de Estrategias de Salud Pública podrían adaptarse para centrarse en contextos o problemas específicos.

Estas adaptaciones podrían incluir un enfoque regional o nacional, un enfoque en una industria u organización comercial en particular, o en contrarrestar una práctica comercial específica. Estas también podrían adaptarse a dominios particulares de la salud pública, reconociendo que la propia fuerza laboral de salud pública es diversa y opera con diferentes oportunidades y limitaciones. La identificación sistemática de

ejemplos de mejores prácticas en todo el mundo podría complementar el trabajo en curso para comprender y desarrollar mecanismos que desafíen el dominio de los actores comerciales.<sup>34-</sup>  
<sup>36</sup> Todos estos pasos destacan roles diferentes pero complementarios para las múltiples partes interesadas que tienen interés en promover y proteger los intereses públicos.

## Referencias

1. Wiist WH. The corporate play book, health, and democracy: the snack food and beverage industry's tactics in context. In: Stuckler D, Siegel K, eds. *Sick societies: Responding to the global challenge of chronic disease*. Oxford: Oxford University Press; 2011:204-216.
2. Brownell KD, Warner KE. The perils of ignoring history: Big Tobacco played dirty and millions died. How similar is Big Food? *The Milbank Quarterly*. 2009;87(1):259-294.
3. Freudenberg N. *Lethal But Legal: Corporations, Consumption, and Protecting Public Health*. New York: Oxford University Press; 2014.
4. Oreskes N, Conway EM. *Merchants of doubt: How a handful of scientists obscured the truth on issues from tobacco smoke to global warming*. New York: Bloomsbury Publishing USA; 2011.
5. Freudenberg N. *At what cost: modern capitalism and the future of health*: Oxford University Press, USA; 2021.
6. Gleckman H. Multi-stakeholder governance: A corporate push for a new form of global governance. *State of power*. 2016:90-106.
7. Mialon M. An overview of the commercial determinants of health. *Globalization and Health*. 2020;16(1):74. doi:10.1186/s12992-020-00607-x
8. Diderichsen F, Dahlgren G, Whitehead M. Beyond 'commercial determinants': shining a light on privatization and political drivers of health inequalities. *European Journal of Public Health*. 2021.
9. Marten R, Amul GGH, Casswell S. Alcohol: global health's blind spot. *The Lancet Global Health*. 2020;8(3):e329-e330. doi:10.1016/S2214-109X(20)30008-5
10. Moodie AR. What public health practitioners need to know about unhealthy industry tactics. *American journal of public health*. 2017;107(7):1047-1049.
11. Lacy-Nichols J, Marten R. Power and the commercial determinants of health: ideas for a research agenda. *BMJ Global Health*. 2021;6(2):e003850. doi:10.1136/bmjgh-2020-003850 %J BMJ Global Health
12. Lacy-Nichols J, Williams O. "Part of the Solution:" Food Corporation Strategies for Regulatory Capture and Legitimacy. *International Journal of Health Policy Management*. 2021.
13. Freudenberg N, Lee K, Buse K, et al. Defining Priorities for Action and Research on the Commercial Determinants of Health: A Conceptual Review. *American Journal of Public Health*. 2021;111(12):2202-2211. doi:10.2105/ajph.2021.306491
14. Earnest MA, Wong SL, Federico SG. Perspective: physician advocacy: what is it and how do we do it? *Academic medicine*. 2010;85(1):63-67.
15. Friel S, Goldman S, Townsend B, Schram A. Australian COVID-19 policy responses: Good for health equity or a missed opportunity? 2020.
16. Sparke M, Williams O. Neoliberal disease: COVID-19, co-pathogenesis and global health insecurities. *Environment Planning A: Economy Space*. 2021:0308518X211048905.
17. Transnational Institute. Reclaiming Public Services: How cities and citizens are turning back privatisation. 2017. [https://www.tni.org/files/publication-downloads/reclaiming\\_public\\_services.pdf](https://www.tni.org/files/publication-downloads/reclaiming_public_services.pdf). Accessed 12 February 2022.
18. Sugar TaATSG. Sugar, tobacco, and alcohol taxes to achieve the SDGs. *Lancet*. 2018;391(10138):2400-2401.
19. Hallum C, Rodriguez SR. Tax revolution or just ... meh? . *Equal*. 2021. <https://equalshope.org/index.php/2021/07/29/tax-revolution-or-just-meh/>.
20. Piven B. Amazon shareholder meeting: Push to put an hourly worker on board. *Aljazeera*. 2021. <https://www.aljazeera.com/economy/2021/5/26/amazon-sharehold-meeting-push-to-put-an-hourly-worker-on-board>. Accessed 17 November 2021.

21. Wander N, Malone RE. Making big tobacco give in: you lose, they win. *American Journal of Public Health*. 2006;96(11):2048-2054.
22. Carriedo A, Koon AD, Encarnación LM, Lee K, Smith R, Walls H. The political economy of sugar-sweetened beverage taxation in Latin America: lessons from Mexico, Chile and Colombia. *Globalization and Health*. 2021;17(1):5. doi:10.1186/s12992-020-00656-2
23. Crosbie E, Sosa P, Glantz SA. Defending strong tobacco packaging and labelling regulations in Uruguay: transnational tobacco control network versus Philip Morris International. *Tobacco Control*. 2018;27(2):185-194. doi:10.1136/tobaccocontrol-2017-053690 %J Tobacco Control
24. Rahman-Shepherd A, Balasubramaniam P, Gautham M, et al. Conflicts of interest: an invisible force shaping health systems and policies. *The Lancet Global Health*. 2021;9(8):e1055-e1056.
25. PAHO. Preventing and Managing Conflicts of Interest in Country-level Nutrition Programs: A Roadmap for Implementing the World Health Organization's Draft Approach in the Americas. 2021. <https://iris.paho.org/handle/10665.2/55055>.
26. Transnational Institute. The Great Takeover: Mapping of Multistakeholderism in Global Governance. 2022. <https://www.tni.org/en/publication/the-great-takeover>. Accessed 18 February 2022.
27. Steele S, Ruskin G, Stuckler D. Pushing partnerships: corporate influence on research and policy via the International Life Sciences Institute. *Public health nutrition*. 2020;23(11):2032-2040.
28. Lacy-Nichols J, Scrinis G, Carey R. The politics of voluntary self-regulation: insights from the development and promotion of the Australian Beverages Council's Commitment. *Public Health Nutrition*. 2019:1-12. doi:10.1017/S1368980019002003
29. Jones SC, Wyatt A, Daube M. Smokescreens and beer goggles: how alcohol industry CSM protects the industry. *Social Marketing Quarterly*. 2016;22(4):264-279.
30. World Health Organization. *Closing the gap in a generation: health equity through action on the social determinants of health: Commission on Social Determinants of Health final report*: World Health Organization; 2008.
31. Pickett KE, Wilkinson RG. Income inequality and health: a causal review. *Social Science & Medicine*. 2015;128:316-326.
32. ShareAction. Investors waking up to the need for ESG overhaul on health. 2021. <https://shareaction.org/news/investors-waking-up-to-the-need-for-esg-overhaul-on-health>. Accessed 12 November 2021.
33. Reimann N. Hundreds Of Companies Pressured To Cut Ties With Group Behind Restrictive Voting Legislation Push Across U.S. *Forbes*. 2021. <https://www.forbes.com/sites/nicholasreimann/2021/06/14/hundreds-of-companies-pressured-to-cut-ties-with-group-behind-restrictive-voting-legislation-push-across-us/?sh=381653bd5b89>. Accessed 12 November 2021.
34. Mialon M, Vandevijvere S, Carriedo-Lutzenkirchen A, et al. Mechanisms for addressing and managing the influence of corporations on public health policy, research and practice: a scoping review. *BMJ open*. 2020;10(7):e034082.
35. Anaf J, Baum F, Fisher M, Friel S. Civil society action against transnational corporations: implications for health promotion. *Health promotion international*. 2020;35(4):877-887.
36. Public Health Advocacy Institute of WA. Advocacy in Action: a toolkit for public health professionals. 2019. <https://www.phaiwa.org.au/the-advocacy-toolkit/>. Accessed 12 November 2021.

## **Apéndice 1: Lecturas adicionales**

### **Fuentes del Manual de Estrategias Corporativas**

Los ejemplos se obtuvieron de lo siguiente: <sup>1-9</sup>

#### **Posibles aliados y colaboradores de la salud pública:**

1) Actuales y ex políticos y burócratas: las conexiones políticas y las habilidades de cabildeo son cruciales para influir en el proceso político.<sup>10</sup> ( y para entender y contrarrestar la influencia de la industria); 2) Periodistas en diversos medios de comunicación: esto es importante para la forma en que se plantean los problemas ante el público; 3) Relaciones públicas y comunicaciones estratégicas: necesarias para que la salud pública sea atractiva e interesante; 4) Abogados: para comprender cómo luchar contra el Manual de Estrategias Corporativas, proteger a los profesionales de la salud pública y litigar cuando sea necesario; 5) Campeones comunitarios, celebridades y personas influyentes en las redes sociales: al igual que los periodistas, estos actores son importantes para generar interés y apoyo público; 6) Ex empleados de industrias dañinas: parte de la inteligencia más útil en el Manual de Estrategias Corporativas proviene de denunciantes y expertos dentro la industria; y 7) Expertos en finanzas, inversión, inteligencia comercial y estrategia corporativa: para desafiar verdaderamente la hegemonía del poder corporativo, debemos comprender la corporación: cuál es su estructura, motivos, recursos, fortalezas y debilidades.

#### **Desarrollar una base de datos de monitoreo de actores comerciales**

Los defensores de la salud pública pueden aprovechar estos recursos y desarrollar sus propias bases de datos específicas para cada país, para rastrear las prácticas políticas y de mercado corporativas.<sup>11</sup>

Se puede desarrollar una comunidad global de práctica para compartir conocimientos sobre cómo identificar y rastrear las tácticas corporativas, las cuales pueden adaptarse a los contextos nacionales específicos. Esto también puede ayudar a consolidar y conectar el conocimiento académico y profesional existente. Existen desafíos prácticos significativos asociados con el desarrollo de una base de datos de monitoreo de actores comerciales que incluye el alcance, las protecciones legales y la propiedad; a pesar de estos problemas, es importante que los defensores de la salud pública desarrollen capacidades en esta área.

#### **Estrategias para amplificar los mensajes de salud pública**

Para promover este mensaje de manera efectiva, los defensores y organizaciones de salud pública deben trabajar con empresas de relaciones públicas y marketing para plantear estratégicamente su mensaje, apelando a la solidaridad social, los derechos humanos y los acuerdos legales actuales. Deben fomentar las relaciones con periodistas para desarrollar campañas mediáticas continuas y bien documentadas con amplio alcance y suficiente repetición/duración.<sup>12</sup> Estas impulsan la educación y la concientización de la comunidad y cambian las actitudes que, a su vez, abren ventanas políticas para que los gobiernos actúen.

## **Referencias**

1. Carriedo A, Koon AD, Encarnación LM, Lee K, Smith R, Walls H. The political economy of sugar-sweetened beverage taxation in Latin America: lessons from Mexico, Chile and Colombia. *Globalization and Health*. 2021;17(1):5. doi:10.1186/s12992-020-00656-2

2. Observatory CE. What the Monsanto Papers tell us about corporate science. 2018. <https://corporateeurope.org/en/food-and-agriculture/2018/03/what-monsanto-papers-tell-us-about-corporate-science>. Accessed 25 March 2021.
3. Elmore BJ. *Citizen Coke: the making of Coca-Cola capitalism*. New York: W. W. Norton & Company; 2015.
4. Influence Map. Big Oil's Real Agenda on Climate Change. 2019. <https://influencemap.org/report/How-Big-Oil-Continues-to-Oppose-the-Paris-Agreement-38212275958aa21196dae3b76220bddd>. Accessed 28 September 2020.
5. Campaign for Accountability. Google's Revolving Door (US). *Tech Transparency Project*. 2021. <https://www.techtransparencyproject.org/articles/googles-revolving-door-us>. Accessed 22 July 2021.
6. McNamee R, Ressa M. Facebook's "Oversight Board" Is a Sham. The Answer to the Capitol Riot Is Regulating Social Media. *Time*. 2021. <https://time.com/5933989/facebook-oversight-regulating-social-media/>.
7. Lee K, Bialous SA. Corporate social responsibility: serious cause for concern. *Tobacco Control*. 2006;15(6):419-419.
8. Crosbie E, Sosa P, Glantz SA. Defending strong tobacco packaging and labelling regulations in Uruguay: transnational tobacco control network versus Philip Morris International. *Tobacco Control*. 2018;27(2):185-194. doi:10.1136/tobaccocontrol-2017-053690 %J Tobacco Control
9. Crosbie E, Thomson G, Freeman B, Bialous S. Advancing progressive health policy to reduce NCDs amidst international commercial opposition: Tobacco standardised packaging in Australia. *Global Public Health*. 2018;13(12):1753-1766. doi:10.1080/17441692.2018.1443485
10. Sabatier PA, Weible CM. The advocacy coalition framework: Innovations and clarifications. *Theories of the policy process*: Routledge; 2019:189-220.
11. Buse K, Mialon M, Jones A. Thinking Politically About UN Political Declarations: A Recipe for Healthier Commitments—Free of Commercial Interests; Comment on “Competing Frames in Global Health Governance: An Analysis of Stakeholder Influence on the Political Declaration on Non-communicable Diseases”. *Int J Health Policy Manag*. 2021.
12. Leask J, Hooker C, King C. Media coverage of health issues and how to work more effectively with journalists: a qualitative study. *BMC Public Health*. 2010;10(1):535. doi:10.1186/1471-2458-10-535
