# Supplementary material for: The public health playbook: ideas for challenging the corporate playbook
Source: PubMed Central journal article supplement — Lancet Glob Health. 2022 May 24;10(7):e1067–72. doi: 10.1016/S2214-109X(22)00185-1 (PMC9197808; doi:10.1016/s2214-109x(22)00185-1), 2022-05-24
Supplement: mmc2.pdf [file mmc2.pdf]

# THE LANCET

## Global Health

### Supplementary appendix 2

This appendix formed part of the original submission and has been peer reviewed. We post it as supplied by the authors.

Supplement to: Lacy-Nichols J, Marten R, Crosbie E, Moodie R. The public health playbook: ideas for challenging the corporate playbook. *Lancet Glob Health* 2022; published online May 24. [https://doi.org/10.1016/S2214-109X\(22\)00185-1](https://doi.org/10.1016/S2214-109X(22)00185-1).

## Appendix 1: Further Reading

### Corporate Playbook Sources

Examples were sourced from the following: <sup>(1-9)</sup>

#### Potential public health allies and collaborators:

1) Current and former politicians and bureaucrats – political connections and savvy lobbying skills are crucial to influencing the political process<sup>(10)</sup> (and understanding and countering industry influence); 2) Journalists across a range of media outlets – this is important for how issues are framed to the public; 3) Public relations and strategic communications: necessary to make public health appealing and engaging; 4) Lawyers – to understand how to fight the Corporate Playbook, to protect public health professionals and to litigate when necessary; 5) Community champions, celebrities and social media influencers – similar to journalists, these actors are important for generating public interest and support; 6) Former employees of harmful industries – some of the most useful intelligence on the Corporate Playbook has come from whistle blowers and industry insiders; and 7) Experts in finance, investment, business intelligence and corporate strategy – to truly challenge the hegemony of corporate power, we need to understand the corporation: what is its structure, motives, resources, strengths and weaknesses.

#### Developing a commercial actor monitoring database

Public health advocates can build on these resources and develop their own, country-specific databases to track corporate political and market practices.<sup>(11)</sup> A global community of practice can be developed to share knowledge about how to identify and track corporate tactics, which can then be adapted to suit specific national contexts. This can also help to consolidate and network existing academic and practitioner knowledge. There are significant practical challenges associated with developing a commercial actor monitoring database including scope, legal protections and ownership – these issues notwithstanding, it is important for public health advocates to build capacity in this area.

#### Strategies to amplify public health messages

To advance this message effectively, public health advocates and organisations must work with public relations and marketing firms to strategically frame their message – appealing to social solidarity, human rights, and existing legal agreements. They must foster relationships with journalists to develop ongoing, well-researched media campaigns with wide reach and sufficient repetition/duration.<sup>(12)</sup> These drive community education and awareness and change attitudes which in turn open up policy windows for governments to act.

1. Carriedo A, Koon AD, Encarnación LM, Lee K, Smith R, Walls H. The political economy of sugar-sweetened beverage taxation in Latin America: lessons from Mexico, Chile and Colombia. *Globalization and Health*. 2021;17(1):5.
2. Observatory CE. What the Monsanto Papers tell us about corporate science 2018 25 March 2021. Available from: <https://corporateeurope.org/en/food-and-agriculture/2018/03/what-monsanto-papers-tell-us-about-corporate-science>.

3. Elmore BJ. Citizen Coke: the making of Coca-Cola capitalism. New York: W. W. Norton & Company; 2015.
4. Influence Map. Big Oil's Real Agenda on Climate Change 2019 28 September 2020. Available from: <https://influencemap.org/report/How-Big-Oil-Continues-to-Oppose-the-Paris-Agreement-38212275958aa21196dae3b76220bddd>.
5. Campaign for Accountability. Google's Revolving Door (US). Tech Transparency Project [Internet]. 2021 22 July 2021. Available from: <https://www.techtransparencyproject.org/articles/googles-revolving-door-us>.
6. McNamee R, Ressa M. Facebook's "Oversight Board" Is a Sham. The Answer to the Capitol Riot Is Regulating Social Media. Time [Internet]. 2021. Available from: <https://time.com/5933989/facebook-oversight-regulating-social-media/>.
7. Lee K, Bialous SA. Corporate social responsibility: serious cause for concern. Tobacco Control. 2006;15(6):419-.
8. Crosbie E, Sosa P, Glantz SA. Defending strong tobacco packaging and labelling regulations in Uruguay: transnational tobacco control network versus Philip Morris International. Tobacco Control. 2018;27(2):185-94.
9. Crosbie E, Thomson G, Freeman B, Bialous S. Advancing progressive health policy to reduce NCDs amidst international commercial opposition: Tobacco standardised packaging in Australia. Global Public Health. 2018;13(12):1753-66.
10. Sabatier PA, Weible CM. The advocacy coalition framework: Innovations and clarifications. Theories of the policy process: Routledge; 2019. p. 189-220.
11. Buse K, Mialon M, Jones A. Thinking Politically About UN Political Declarations: A Recipe for Healthier Commitments—Free of Commercial Interests; Comment on “Competing Frames in Global Health Governance: An Analysis of Stakeholder Influence on the Political Declaration on Non-communicable Diseases”. Int J Health Policy Manag. 2021.
12. Leask J, Hooker C, King C. Media coverage of health issues and how to work more effectively with journalists: a qualitative study. BMC Public Health. 2010;10(1):535.
